# Supplementary material for: Tumor-Localized Administration of α-GalCer to Recruit Invariant Natural Killer T Cells and Enhance Their Antitumor Activity against Solid Tumors
Source: MDPI journal article supplement (doi:10.3390/ijms23147547), 2022-07-07
Supplement: s1 [file s1]

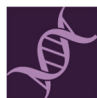

Article

# Tumor-Localized Administration of $\alpha$ -GalCer to Recruit Invariant Natural Killer T Cells and Enhance Their Antitumor Activity against Solid Tumors

Yan-Ruide Li, Yang Zhou, Matthew Wilson, Adam Kramer, Ryan Hon, Yichen Zhu, Ying Fang and Lili Yang

- <sup>1</sup> Department of Microbiology, Immunology & Molecular Genetics, University of California, Los Angeles, CA 90095, USA; charlie.li@ucla.edu (Y.-R.L.); zzydcat@g.ucla.edu (Y.Z.); mwilson193@g.ucla.edu (M.W.); akramer931@g.ucla.edu (A.K.); ryanhonchenghao@gmail.com (R.H.); yichenzhujohn@g.ucla.edu (Y.Z.); yingfang1913@g.ucla.edu (Y.F.)
- <sup>2</sup> Eli and Edythe Broad Center of Regenerative Medicine and Stem Cell Research, University of California, Los Angeles, CA 90095, USA
- <sup>3</sup> Jonsson Comprehensive Cancer Center, David Geffen School of Medicine, University of California, Los Angeles, CA 90095, USA
- <sup>4</sup> Molecular Biology Institute, University of California, Los Angeles, CA 90095, USA
- \* Correspondence: liliyang@ucla.edu; Tel.: +13-10-825-8609

**Citation:** Li, Y.-R.; Zhou, Y.; Wilson, M.; Kramer, A.; Hon, R.; Zhu, Y.; Fang, Y. Tumor-Localized Administration of  $\alpha$ -GalCer to Recruit Invariant Natural Killer T Cells and Enhance Their Antitumor Activity against Solid Tumors. *Int. J. Mol. Sci.* **2022**, *23*, 7547. <https://doi.org/10.3390/ijms23147547>

## Supplementary Materials

Academic Editor: Walter Fiedler

Received: 2 June 2022

Accepted: 6 July 2022

Published: 7 July 2022

**Publisher's Note:** MDPI stays neutral with regard to jurisdictional claims in published maps and institutional affiliations.

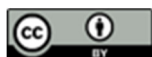

**Copyright:** © 2022 by the authors. Licensee MDPI, Basel, Switzerland. This article is an open access article distributed under the terms and conditions of the Creative Commons Attribution (CC BY) license (<http://creativecommons.org/licenses/by/4.0/>).

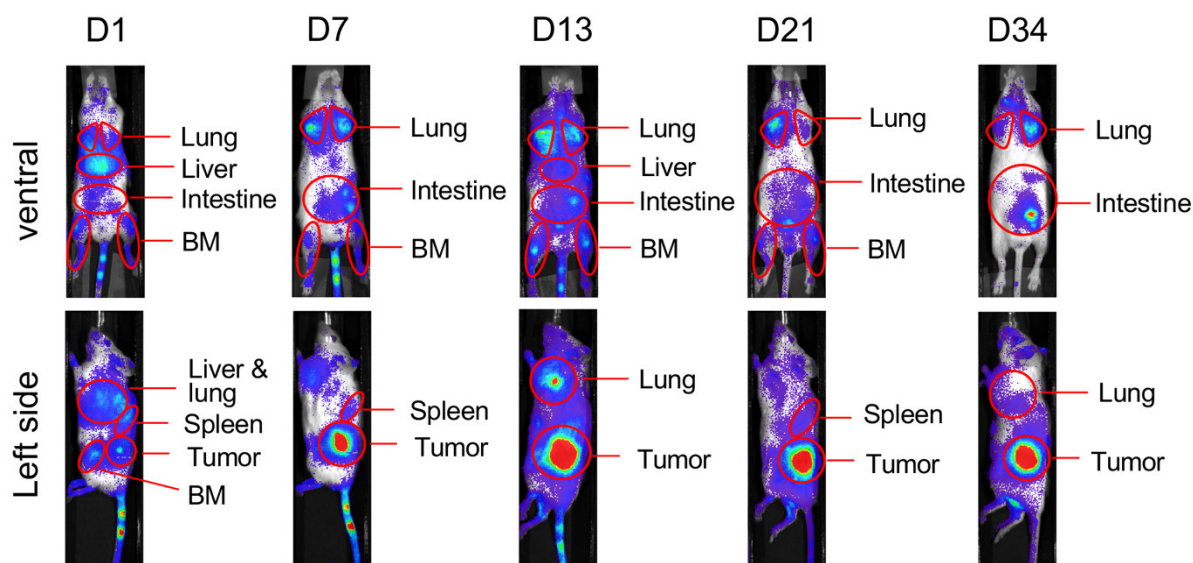

**Figure S1.** Tissue biodistribution of PBMC-iNKT cells in an A375-CD1d human melanoma xenograft NSG mouse model. Related to Figure 5. Representative images showing iNKT cell load in experimental mice over time. These mice are injected with A375-CD1d tumor cells,  $\alpha$ GC and PBMC-iNKT-FG cells. Both ventral and left side views are shown.

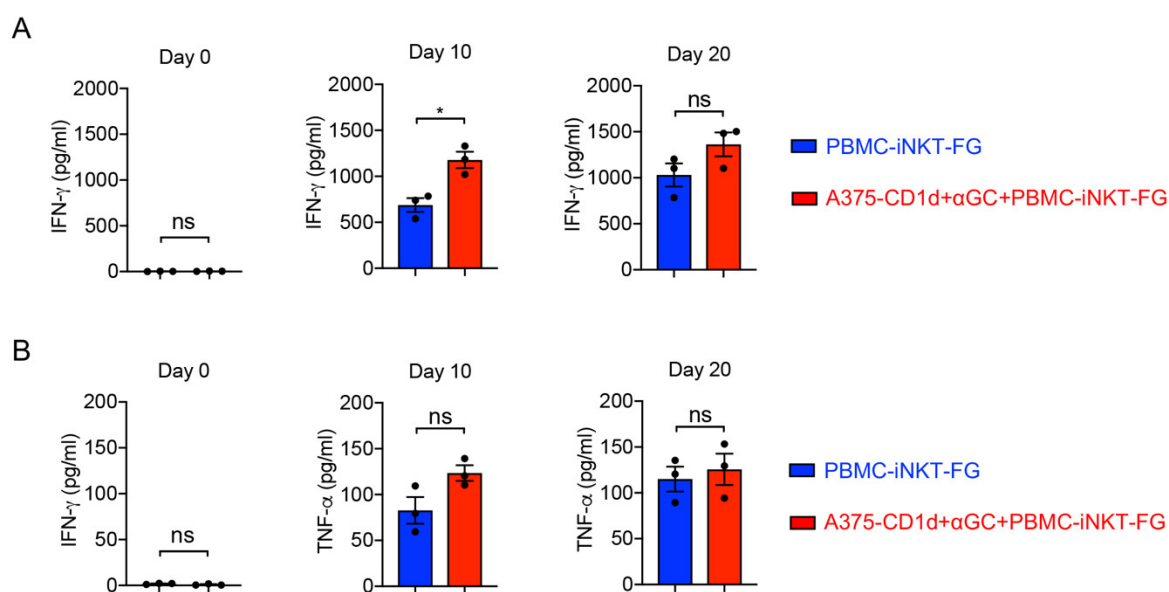

**Figure S2.** Mouse serum cytokine changes in an A375-CD1d human melanoma xenograft NSG mouse model. Related to Figure 5. Levels of human IFN- $\gamma$  (A) and TNF- $\alpha$  (B) were measured by ELISA on serum collected from mouse peripheral blood on different days after PBMC-iNKT-FG cell infusion. Representative of 2 experiments. Data are presented as the mean  $\pm$  SEM. ns, not significant, \* $p < 0.05$  by Student's  $t$  test.
